1 **Fast and simple tool for the quantification of biofilm-embedded cells sub-populations from**  
2 **fluorescent microscopic images**

3  
4 Short running title: tool for the quantitative analysis fluorescent images

5  
6 Mikhail I Bogachev<sup>1,2</sup>, Oleg A Markelov<sup>1</sup>, Elena Trizna<sup>2</sup>, Diana Baydamshina<sup>2</sup>, Pavel Zelenikhin<sup>2</sup>,  
7 Regina Murtazina<sup>2</sup>, Airat R Kayumov<sup>2,\*</sup>

8  
9  
10  
11  
12 <sup>1</sup>Biomedical Engineering Research Center, St. Petersburg Electrotechnical University, St. Petersburg,  
13 Russia

14  
15 <sup>2</sup>Institute of Fundamental Medicine and Biology, Kazan Federal University, Russia  
16

17  
18  
19 \* Corresponding author

20 E-mail: kairatr@yandex.ru  
21  
22  
23  
24  
25  
26

## 27 **Abstract**

28 Fluorescent staining is a common tool for both quantitative and qualitative assessment of pro- and  
29 eukaryotic cells sub-population fractions by using microscopy and flow cytometry. However, direct cell  
30 counting by flow cytometry is often limited, for example when working with cells rigidly adhered  
31 either to each other or to external surfaces like in bacterial biofilms or adherent cell lines and tissue  
32 samples. An alternative approach is provided by using fluorescent microscopy and confocal laser  
33 scanning microscopy (CLSM), which enables the evaluation of fractions of cells subpopulations in a  
34 given sample. To facilitate the quantitative assessment of cell fractions in microphotographs, we  
35 suggest a simple two-step algorithm that combines the cell selection based and the statistical  
36 approaches. Based on a series of experimental measurements performed on bacterial and eukaryotic  
37 cells under various measurement conditions, we show explicitly that the suggested approach effectively  
38 accounts for the fractions of different cell sub-populations (like the live/dead staining in our samples)  
39 in all studied cases that are in good agreement with manual cell counting on microphotographs and  
40 flow cytometry data. This algorithm is implemented as a simple software tool that includes an intuitive  
41 and user-friendly graphical interface for the initial adjustment of algorithm parameters to the  
42 microscopic imaging conditions as well as for the sequential analysis of homogeneous series of similar  
43 microscopic images without further user intervention. The software tool entitled *BioFilmAnalyzer* is  
44 freely available online at [http://kpfu.ru/eng/strau/laboratories/molecular-genetics-of-microorganisms-](http://kpfu.ru/eng/strau/laboratories/molecular-genetics-of-microorganisms-lab/software/biofilmanalyzer-v10)  
45 [lab/software/ biofilmanalyzer-v10](http://kpfu.ru/eng/strau/laboratories/molecular-genetics-of-microorganisms-lab/software/biofilmanalyzer-v10)

46

## 47           **Introduction**

48           One of the key issues in both pro- and eukaryotic cell studies is the quantitative characterization  
49 of cellular subpopulations like the estimation of the fractions of either live or dead cells in a given  
50 population, differentiation of bacterial species in mixed biofilms or eukaryotic cell types in culture.  
51 There are two common experimental approaches to these issues, namely the flow cytometry and the  
52 fluorescent microscopy. In both methods the cells are stained with fluorescent dyes which specifically  
53 differentiate the cells of interest. Thus, Syto9/PI, DioC6/PI, AO/PI, CFDA/PI, Calcein AM/PI,  
54 Hoechst/PI and many other combinations of dual staining are widely used to differentiate viable and  
55 non-viable cells [1-3]. Normally, the first dye is biochemically modified by viable cells followed by the  
56 production of the green-fluorescent product. The second dye like the propidium iodide or ethidium  
57 bromide penetrates through the damaged membrane of dead cells forming complexes with nucleic  
58 acids and providing red fluorescence. While many researchers report that the estimation of viable cells  
59 fraction by using vital staining often exhibits significant differences in comparison with the values  
60 obtained by using classical microbiological methods [4], fluorescent staining remains a fast and easy  
61 approach to the quantification of (non-)viable cells.

62           While flow cytometry provides with a much more accurate assessment of the cell subpopulation  
63 fractions [5, 6], it has principal limitations that significantly narrow its application area [7]. In  
64 particular, cells being adhered to each other and to external surfaces should be suspended prior to their  
65 infusion into a cytometer that appears difficult when, for example, bacterial biofilms or strongly  
66 adherent cells are analyzed, or the original structure of the cell colonies, cell complex or tissue structure  
67 should be preserved. Moreover, flow cytometer is normally unable to detect particles <0.500  $\mu\text{m}$  [8].  
68 Finally, currently available flow cytometry systems require considerable amount of maintenance and  
69 highly skilled operators.

70           Fluorescent microscopy is largely free of above limitations and provides a reasonable

71 alternative to the cytometric measurements. However, in the presence of adherent and/or spore-like  
72 cells they largely overlap leading to the limitations of direct cell selection and counting algorithms in  
73 the microscopic images. The situation gets even more complicated when the cells are not equidistantly  
74 stained, image quality and color balance varies in different fields of view. Manual counting is usually  
75 possible, while it requires significant efforts from experts increasing the lab personnel workload  
76 drastically. Thus, automatic or semi-automatic analysis of cells seems to be a fast and easy approach for  
77 the microscopic data quantification. In the last two decades, a number of methods and computer-  
78 assisted algorithms have been developed to resolve the cell counting issue implemented in a number of  
79 both commercial and free software tools [9-13]. Existing software solutions include cell counting and  
80 classification algorithms [14], estimation of their parameters from microscopic imaging [15], 3d  
81 reconstructions from confocal microscopy data [16] and several other more specific applications.  
82 However, automatic microscopic image analysis remains challenging in the presence of adherent and/or  
83 spore-like cells that are common conditions in biofilm studies. Automatic counting methods are usually  
84 based either (i) on detection, selection and counting of discrete objects, or (ii) on the statistical analysis  
85 of the image properties that avoid direct counting approach and estimate some effective characteristics  
86 from the statistical properties of the entire image [17]. While the detection methods fail under cell  
87 overlapping conditions, the statistical assessment methods are unable to differentiate between various  
88 types of cells. Among few exceptions that largely overcome the above limitations, a very recently  
89 designed software tool for quantification of live/dead cells in a biofilm based on a series of image  
90 transformation could be mentioned [18].

91 Another common disadvantage of many automatic image analysis tools in practical settings is  
92 often, though may sound surprising, their excessive use of automation. Quite often image analysis  
93 algorithms use complex transformations with parameters that can be hardly controlled by a user who is  
94 not an expert in digital image processing. As a result, there is little or no feedback between the

95 algorithm and its end user. Thus, the user deals with a kind of black box design, where an image is  
96 inserted and a value comes out, without being able to cross-check the performance of the algorithm at  
97 some intermediate steps. Despite the increasing complexity and performance of image processing tools,  
98 the variety of cell structures and microscopic imaging conditions to our opinion is still too broad to  
99 fully rely upon automation in all cases.

100 Here we suggest an algorithm based on a simple combination of the object counting and  
101 statistical approaches and easy-to-use cell-counting software tool, *BioFilmAnalyzer*, freely available at  
102 [http://kpfu.ru/eng/strau/laboratories/molecular-genetics-of-microorganisms-lab/software/](http://kpfu.ru/eng/strau/laboratories/molecular-genetics-of-microorganisms-lab/software/biofilmanalyzer-v10)  
103 *biofilmanalyzer-v10*. Following preliminary threshold-based filtering and segmentation of the image,  
104 an effective number of cells is calculated under partially-manual control by the investigator. Based on a  
105 series of experimental measurements performed in bacterial cells of *S.auerus* and *B.subtillis* exhibiting  
106 different shapes as well as eukaryotic cells, we show explicitly that the suggested approach effectively  
107 account for the fractions of live/dead cells in all studied cases. The validity of the *BioFilmAnalyzer*  
108 based cells live/dead fractions quantification was assessed by comparison with the results of manual  
109 counting performed by several experts in visual microscopic image analysis and cytometric  
110 measurements.

111

112

## 113 **Materials and methods**

### 114 **Bacterial strains, cell lines and fluorescent microscopy**

115 The fluorescent microscopic images of bacterial cells obtained in previous works were used [21,  
116 22, 23, 24]. Briefly, *Staphylococcus aureus* (ATCC® 29213™) and *Bacillus subtilis* 168 grown in 35-  
117 mm TC-treated polystyrol plates (Eppendorf) for 48 hours under static conditions at 37°C to obtain  
118 rigid biofilm structures were further subjected to differential live/dead fluorescent staining.

119 The human colon adenocarcinoma Caco-2 cells (RCCC) were cultured in DMEM supplemented  
120 with 10% FBS, 2 mM L-glutamine, 100 µg ml<sup>-1</sup> penicillin and 100 µg ml<sup>-1</sup> streptomycin. The cells  
121 were seeded in 24-well plates at the density of 30000 cells per well and allowed to attach overnight.  
122 The cells were cultured at 37 °C and 5% CO<sub>2</sub> until 70% confluence and camptothecin (Sigma-Aldrich)  
123 was added in final concentration of 6 µM. After 24 h of exposition the cells were subjected to  
124 fluorescent staining and analyzed with flow cytometry and fluorescent microscopy.

125 The viability of biofilm-embedded cells was evaluated by staining for 5 min with the Acridine  
126 orange (Sigma) at final concentration of 0.12 µg/ml (green fluorescence) 3,3'-Dihexyloxacarboyanine  
127 iodide (DioC6) (Sigma) at final concentration of 0.02 µg/ml (green fluorescence) and propidium iodide  
128 (Sigma) at final concentration of 3 µg/ml (red fluorescence) to differentiate between bacteria with  
129 intact and damaged cell membranes (live and dead cells). The eukaryotic cells were stained with DioC6  
130 (0.02 µg/ml) and propidium iodide (3 µg/ml). The microscopic imaging was performed using either  
131 Carl Zeiss Observer 1.0 microscope or Carl Zeiss CLSM780 with 40-100× magnification.

132

133

134

### 135 **Flow cytometry**

136 Cytometric analysis was performed using BD FACSCanto II flow cytometer. The Caco-2 cells  
137 were stained as described above. Following data analysis was carried out using FACSDiva software.

138

## 139 **Image analysis methodology**

140 Image analysis starts with the preliminary detection of pixels with given color channel intensity  
141 (red, green or overall) exceeding a given threshold. Fig 1A shows a sample of original microscopic  
142 image, while Fig 1B shows the result of threshold-based selection of the red channel according to  
143  $I_R - I_G > T$ , where  $I_R$  and  $I_G$  are the intensities in the red and in the green channels, respectively,  
144  $T = 30$  is the threshold setting. In the next step, the preprocessed image is segmented into separate  
145 non-overlapping objects by adjusting horizontally, vertically or diagonally neighboring pixels above the  
146 threshold to the same object. Additionally, objects with a given set of properties that determine the cell  
147 subpopulation are selected. Fig 1C exemplifies the results of selection by size, with objects only in a  
148 given size range between  $s_{\min} = 500$  and  $s_{\max} = 1000$  pixels being highlighted, where the color  
149 encodes each object.

150 In the following, we count the selected objects, calculate their total area, and obtain the average  
151 size of the typical cell from the studied subpopulation. Next we determine the effective number of cells  
152 by dividing the total area above the threshold (Fig 1B) by the average size of selected cells (Fig 1C)  
153 according to

$$154 \quad N_R^{\text{eff}} = \frac{S_R}{\bar{S}_R [s_{\min} \dots s_{\max}]} \quad \text{и} \quad N_G^{\text{eff}} = \frac{S_G}{\bar{S}_G [s_{\min} \dots s_{\max}]},$$

155 where  $N_R^{\text{eff}}$ ,  $N_G^{\text{eff}}$  are the effective numbers of cells in the red and green channels, respectively;

156  $S_R$ ,  $S_G$  are the total area of selected cells belonging to the red and green channels, respectively;

157  $\bar{S}_R [s_{\min} \dots s_{\max}]$ ,  $\bar{S}_G [s_{\min} \dots s_{\max}]$  are the average area of cells with a size range between  $s_{\min}$  and

158  $s_{\max}$ .

159

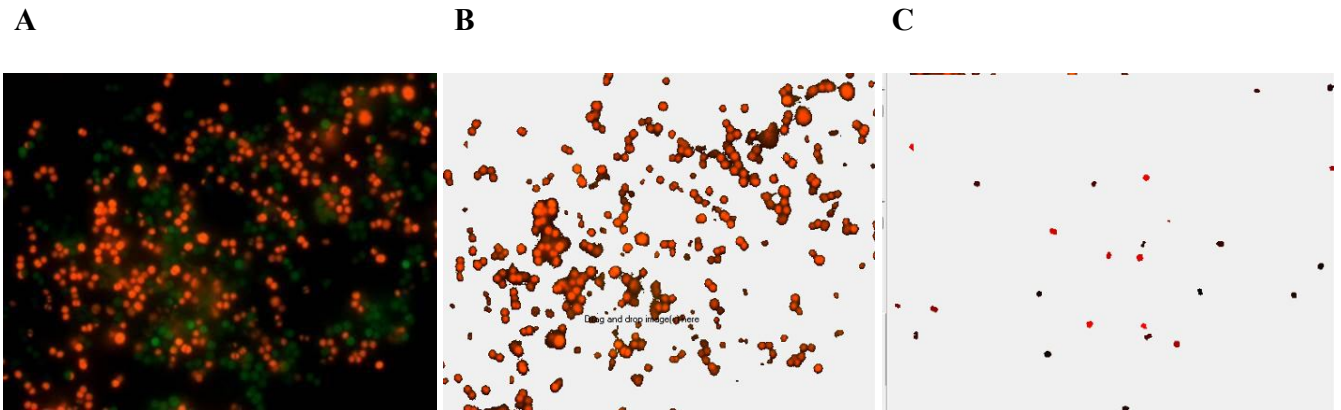

160 **Fig 1. Consecutive steps in cell quantification by *BioFilmAnalyzer*.** (A) original image containing  
161 overlapped red and green channels, (B) selected red channel data after threshold-based filtering, (C)  
162 selected cells of size between  $s_{\min}$  and  $s_{\max}$  that are used to determine the effective single cell size with  
163 each separate cell shown by another color as determined by the automatic segmentation algorithm.

164

165 While  $T$ ,  $s_{\min}$  and  $s_{\max}$  have to be appropriately chosen, their choice has to be performed once  
166 in a series of similar experiments considering similar cell types. Accordingly, so far their manual choice  
167 by expert seems to be the easiest solution option, since the feedback from the first samples being tested  
168 allows for a more specific adjustment of these parameters, to avoid potentially bizzare results that may  
169 arise in the case of their blind application with no feedback. In the following, for the entire series of  
170 experiments the parameters are fixed and no further manual adjustment is required. Thus a series of  
171 images representing different fields of view under identical conditions in simply passed through an  
172 algorithm. When the differences in the conditions are minor and do not change significantly the  
173 microscopic images, but influence only some of their parameters like the live/dead cell fractions, such  
174 as testing antimicrobials with gradually changing concentrations, several series of images can be  
175 submitted without further adjustment of the algorithm parameters. The implemented software solution



176 organizes the results of calculations in a table, that could be exported, and represent them in a graph.

177

## 178 **Statistical assessment**

179 Here we used simple linear regression without intercept term, i.e.  $y = kx$ . In the suggested  
180 regression model the ideal case corresponds to  $k=1$  or simply  $y = x$  that would mean perfect agreement  
181 between automatic and manual expert counting. The quality of the results is characterized by two  
182 independent coefficients. The first one is the standard coefficient of determination  $R^2$ .  $R^2 = 1 - \frac{SS_{res}}{SS_{tot}}$ ,

183 where  $SS_{tot}$  is the total sum of squares  $SS_{tot} = \sum_i (f_i - \bar{y})^2$  and  $SS_{res}$  is the residual sum of squares

184  $SS_{res} = \sum_i (y_i - f_i)^2$ , here  $\bar{y} = \frac{1}{n} \sum_{i=1}^n y_i$  is the mean value of all analyzed data points and  $f_i$  is

185 calculated regression point. The  $R^2$  coefficient indicates how well the analyzed data set is replicated by  
186 the regression model.

187

188 In this investigation it is also important how close is the regression model to the ideal case  
189  $y = x$ . Therefore we introduce a similarly designed metric of how well the model  $y = kx$  is close to the  
190 ideal counting line  $y = x$  which is called  $L^2$ . Its definition is similar to  $R^2$  besides the calculation is done  
191 for regression points  $f_i$ .  $SS_{res}$  for  $L^2$  is calculated as  $SS_{res} = \sum_i (f_i - x_i)^2$ , where  $x_i$  is the corresponding

192 abscissa value for the current  $f_i$ , and  $SS_{tot}$  is the same as in  $R^2$ . In ideal case when observational

193 regression line follows  $y=x$ ,  $L^2 = 1 - \frac{\sum_i (f_i - x_i)^2}{\sum_i (f_i - \bar{f})^2} = 1 - \frac{0}{\sum_i (f_i - \bar{f})^2} = 1$ . Thus both  $R^2$  and  $L^2$

194 coefficients range from 0 to 1.

195

196

197

## 198 **Results and Discussion**

### 199 **Software description**

200 *BioFilmAnalyzer* software can be used to count any bacterial or eukaryotic fluorescent stained  
201 cells from two-dimensional microphotographs provided either as single images or as a series of images  
202 obtained under similar conditions such as quality and magnification (for example, several views of the  
203 same sample taken with fixed camera settings). This in-house algorithm was implemented in C++  
204 programming language and is compatible with Windows (XP versions and higher). The software tool  
205 has a simple user-friendly environment for the image analysis with the two-step algorithm allowing  
206 manual parameter adjustments by end user at each step. The logic of the image analysis is based on the  
207 preliminary adjustment of the algorithm parameters by using one or several images that the investigator  
208 finds more or less representative for the studied cohort in terms of imaging conditions. In the first step,  
209 simple drag & drop of a single image into the program window initiates its instant processing including  
210 threshold based detection of cells according to a specified rule based on the exceedance of a given  
211 threshold by either a certain color channel, difference between color channels or overall intensity. The  
212 threshold value  $T$  which is the only algorithm parameter in this first step can next be adjusted by the  
213 investigator by its increasing in cases of strongly autofluorescent background or by its decreasing in  
214 low contrast images until the background noise is eliminated. For image series exhibiting strongly non-  
215 homogeneous color distributions in the studied color channels, instead of the manual adjustment of the  
216 threshold value  $T$  for each of the images individually, preliminary image color normalization often  
217 appears a faster alternative. Since color normalization is a simple and standard image preparation  
218 procedure that is straightforward and thus can be applied consecutively to a series of images using  
219 many commercial or free image processing software tools (e.g., ImageMagick, Gimp etc.), we do not  
220 focus further on this issue. However, as we show below, since our algorithm is robust against moderate  
221 variations of the threshold  $T$  around its optimized value for a given color distribution, the color

222 normalization appears unnecessary for image series with moderate variations of color distributions and  
223 may be required only rarely under considerable variations of imaging conditions. The view can be  
224 easily switched between the original and the processed images by a single click on the upper image  
225 panel. In the second step, the effective cell size should be adjusted such that only or nearly only single  
226 cells appear in the lower image panel, which shows the processed image after a simple segmentation  
227 procedure. Increasing of the lower limit for the cell size helps to eliminate some noise bursts, while  
228 increasing of the upper limit eliminates large patches of adherent cells from the effective cell size  
229 statistics. With the cell size window representing only a simple criteria that often appears insufficient,  
230 whenever necessary, further elimination of anomalous segments can be done manually by selecting and  
231 double-clicking over them in the lower image panel. Since the parameters including sizes of different  
232 sub-population of cells can differ from one another (e.g., non-viable eukaryotic cells are commonly  
233 smaller than viable cells), the effective cell size should be re-adjusted for each studied sub-population  
234 of cells. For this reason, the analysis of each color channel should be performed separately, and thus  
235 with the exception of the intensity based analysis rule, all other options analyze color channels  
236 individually. Thus they perform similarly for single or overlapped color channel images. Finally, the  
237 effective number of cells is determined as the total area of the image exceeding the threshold  $T$  shown  
238 in the upper panel divided by the effective cell size determined from the lower image panel. Once a  
239 reasonable set of algorithm parameters is found, a series of up to 100 images can be dropped onto the  
240 program window for fully automated analysis with the same set of parameters as determined from the  
241 first one or several representative images without further user intervention. Finally, the results can be  
242 exported to the MS Excel for the validation of the results and following statistical analysis.

243 In comparison with some other freely available image processing and analysis software [18-20],  
244 our image-processing procedure is semi-automatic: settings are modified by manually adjusting the  
245 analysis parameters and each step is controlled with an expert to evaluate the analysis quality. Being

246 optimized once for a first image in a series the software analyzes other images automatically over  
247 coffee-break.

## 248 **Software validation by bacterial cells counting**

249 We analyzed the efficiency of the proposed algorithm using the fluorescent images of coccal  
250 (*Staphylococcus aureus*) and rod (*Bacillus subtilis*) cell morphologies containing different fraction of  
251 viable (green-stained) cells. Since the cell suspension can be easily analyzed with flow cytometry, we  
252 focused on the analysis of adherent, biofilm-embedded cells. For that, we used previously obtained  
253 series of microphotographs of *S.aureus* in 48-72 h old biofilms treated with different antimicrobials  
254 [21, 22]. Cells were stained with DioC6 and propidium iodide to differentiate the viable and non-viable  
255 cells, and non-viable cells fraction was quantified with *BioFilmAnalyzer* software. As a representative  
256 example, twelve images with overlapped red and green channels containing different fraction of viable  
257 cells are shown in Fig 2. Since the image brightness, contrast and saturation vary from image to image  
258 depending on the staining quality, microscope settings and sample itself, for each microphotograph  
259 shown in Fig 2 the thresholds  $T$  (ranging from 25 to 55) and effective cell sizes were chosen  
260 individually. Next to validate the performance of the algorithm when the intensity threshold is chosen  
261 quite arbitrarily without careful manual adjustment to the imaging conditions, these microphotographs  
262 were analyzed consequently for different analysis thresholds (15, 20, 30, 45 and 60) and the results  
263 obtained by the automatic cell counting were plotted as a linear function  $y=kx$  of the manual cell  
264 counting (Fig 3 A-C). While the number of both red (non-viable, Fig 3A) and green (viable, Fig 3B)  
265 cells decreases at higher thresholds, their fractions (i.e., live/dead ratio) remained similar for each  
266 threshold value exhibiting no significant differences with the manual evaluation data (compare thick  
267 dashed line corresponding to the ideal fit of manual and automatic counting, Fig 3C).

268 Table 1 shows the regression coefficients  $k$  for the linear regressions  $y=kx$  and their coefficients  
269 of determination  $R^2$ . Since by definition there should be no systematic shift between the automatic and

270 the manual count, i.e. in the absence of viable or non-viable cells the respective number of cells equals  
271 zero, we used the simplest linear regression model without intercept. Since the ideal counting  
272 corresponds to  $k=1$  or simply to the line given by  $y=x$ , we also calculated another coefficient denoted  
273  $L^2$  that determines the deviation of the obtained regression line  $y=kx$  from the ideal counting line  $y=x$ .  
274 Of note, the automatic cell enumeration by *BioFilmAnalyzer* software exhibited the best fit with  
275 manual count at the analysis threshold of 45 (for images present on Fig 2). For further details on the  
276 statistical analysis of our results, we refer to the Materials and Methods section at the end of this paper.

277 The individual adjustment of the threshold and effective cell size is obviously possible only  
278 when a small number of images should be analyzed. For a more accurate quantification, a series of 10  
279 or more images from the same sample normally should be analyzed. The *BioFilmAnalyzer* software  
280 allows analysis with constant settings of threshold and cell size of 2 and more images when they are  
281 dragged & dropped simultaneously onto the program window. To estimate the performance of the  
282 software when the images with different quality are analyzed without individual optimization of the  
283 intensity threshold, the series of 115 microphotographs randomly taken from different experiments  
284 were analyzed consequently at different thresholds (15, 20, 30, 45 and 60) with fixed cell size ranges  
285 used to determine the effective cell sizes. The results were compared against manual cell counting data  
286 (Fig 3 D-F). Similarly to previous results obtained for 12 images with accurate settings of both  
287 thresholds and cell sizes, the live/dead ratio remains almost similar for each threshold value and the  
288 obtained regression fit is in an excellent agreement with the manual cell counting data indicated by  $L^2$   
289 being very close to 1.0 at thresholds in the range of 15-30 (Table 1).

290

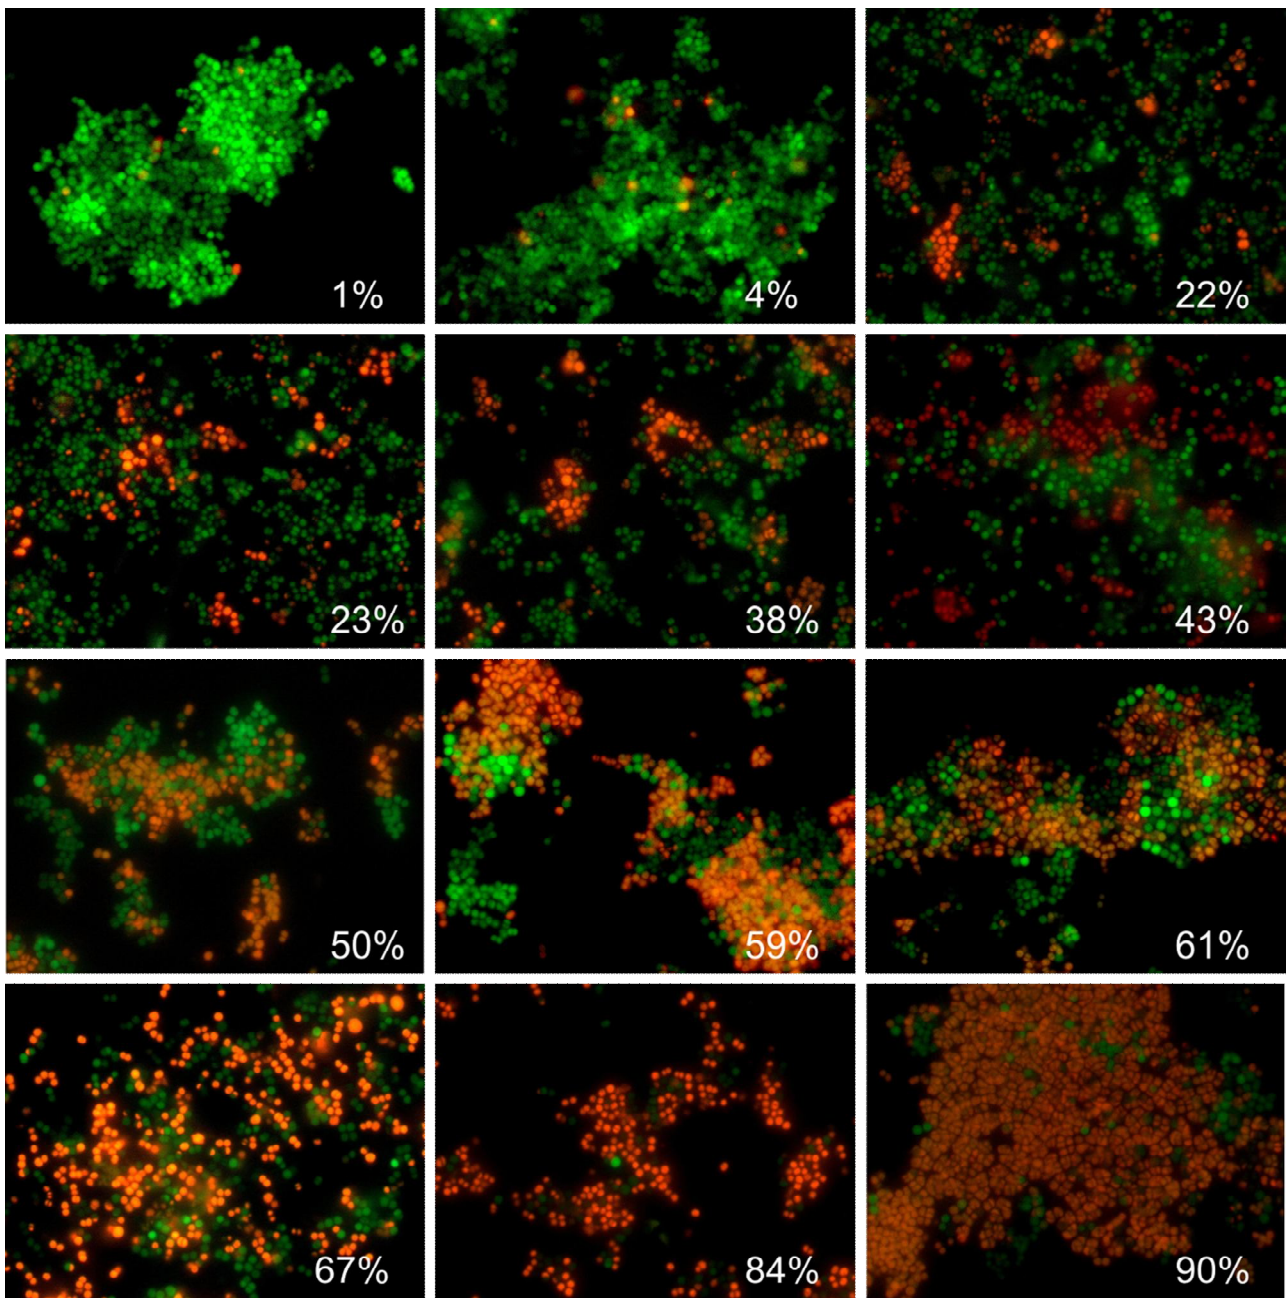

291

292

293 **Fig 2. Evaluation of the *S.aureus* biofilm-embedded non-viable cells fraction by using**

294 ***BioFilmAnalyzer* software exemplified for 12 microscopic images. The percentage of red-stained**

295 **cells quantified by the *BioFilmAnalyzer* software is shown in each panel.**

296

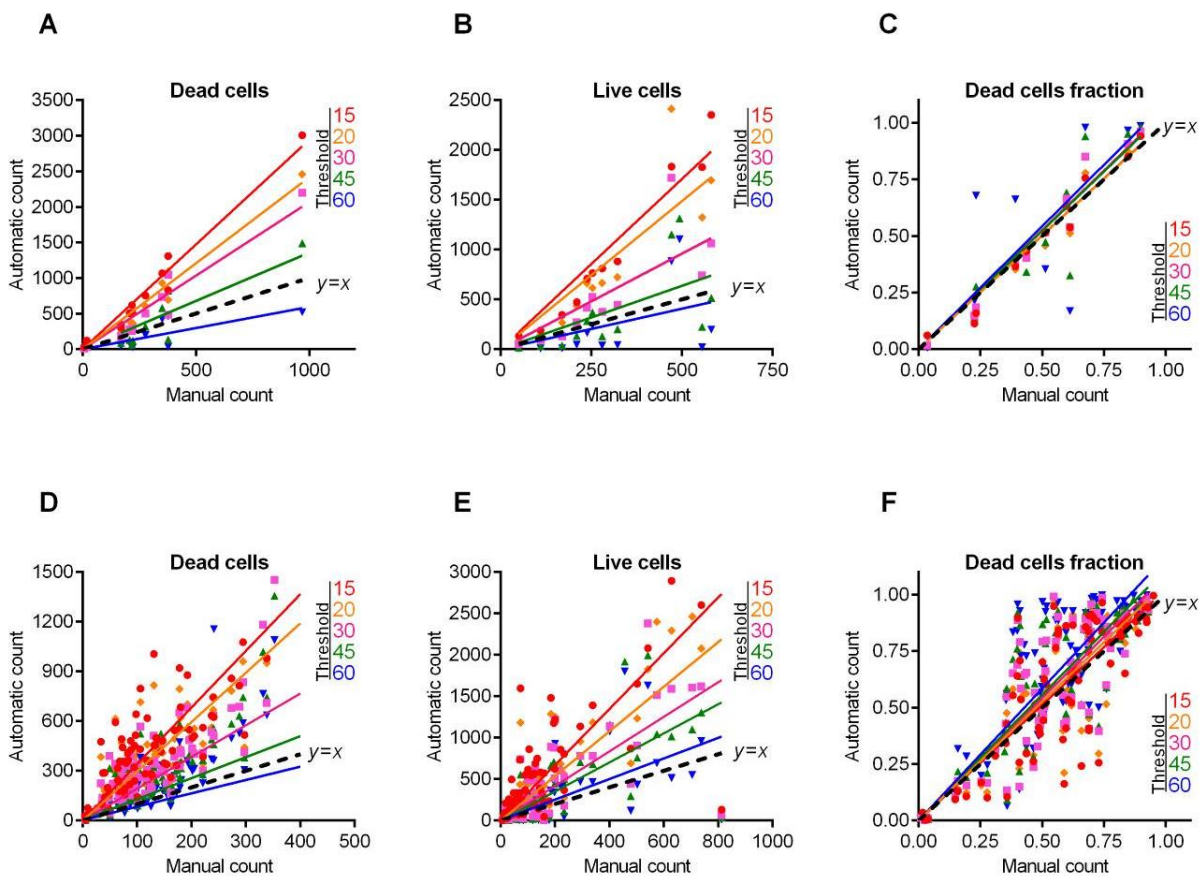

297

298 **Fig 3. *S.aureus* cells count and live/dead ratio dependence on the image analysis threshold  $T$ .** Full  
299 lines show the linear regression lines, while dashed line shows the ideal counting line as determined by  
300 the manual analysis performed by several experts in visual microscopic image analysis. Panels A-C  
301 show data for the 12 images presented in Fig 2. Panels D-F show data for the 115 microscopic images  
302 taken randomly from different experiments with various imaging conditions.

303

304



305 **Table 1. Regression coefficients  $k$ , the coefficients of determination  $R^2$  and the accuracy**  
306 **coefficient  $L^2$  indicating the correspondence between the automatic and the manual counting for**  
307 **the *S.aureus* live/dead ratios on fluorescent images.**

| Threshold | 12 images |       |       | 115 images |       |       |
|-----------|-----------|-------|-------|------------|-------|-------|
|           | k         | $R^2$ | $L^2$ | k          | $R^2$ | $L^2$ |
| 15        | 1,01      | 0,95  | 1,00  | 1,02       | 0,63  | 1,00  |
| 20        | 1,00      | 0,94  | 1,00  | 1,05       | 0,65  | 0,99  |
| 30        | 1,05      | 0,94  | 0,99  | 1,08       | 0,66  | 0,98  |
| 45        | 1,05      | 0,73  | 0,99  | 1,11       | 0,72  | 0,96  |
| 60        | 1,09      | 0,59  | 0,98  | 1,17       | 0,67  | 0,92  |

308

309

310 Next, similar analysis was performed on microscopic images of *B.subtilis* biofilm-embedded  
311 cells treated with different antimicrobials [23]. Like in the previous example, Fig 4 shows 12  
312 representative images with different fraction of viable cells quantified with *BioFilmAnalyzer* software.  
313 Fig 5 A-C is designed similar as Fig 3 and shows the interdependence of the image analysis threshold  
314 and cell number calculated by *BioFilmAnalyzer*. Similar to *S.aureus* microphotographs, the cell number  
315 calculated automatically increased at high threshold with the best fit with manual count at threshold  
316 value of 45, while the live/dead ratio remained unchanged with  $L^2$  exceeding 0.96 at thresholds up to  
317 45, suggesting that the performance of the algorithm does not depend on the fine tuning of the  
318 threshold and on the cell shape. Fig 5 D-F shows the analysis of 50 randomly chosen images of  
319 live/dead stained *B.subtilis* cells. Similarly, the statistical analysis does not reveal significant  
320 differences between automatic and manual live/dead ratio estimation (Table 2).

321 While the absolute cell counting depends on the image analysis threshold which should be  
322 adjusted manually and therefore has a factor of subjectivity, the live/dead ration quantification does not  
323 depend on the threshold settings in range of 15-60 color intensity units (on the 0..255 scale) exhibiting  
324 linear function with  $R^2$  values exceeding 0.9 and regression coefficients of  $k$  ranging between 0.9 and  
325 1.1 (Tables 1 and 2). This fact allows performing the automatic analysis of multiple images with  
326 constant settings optimized for first image in a series.

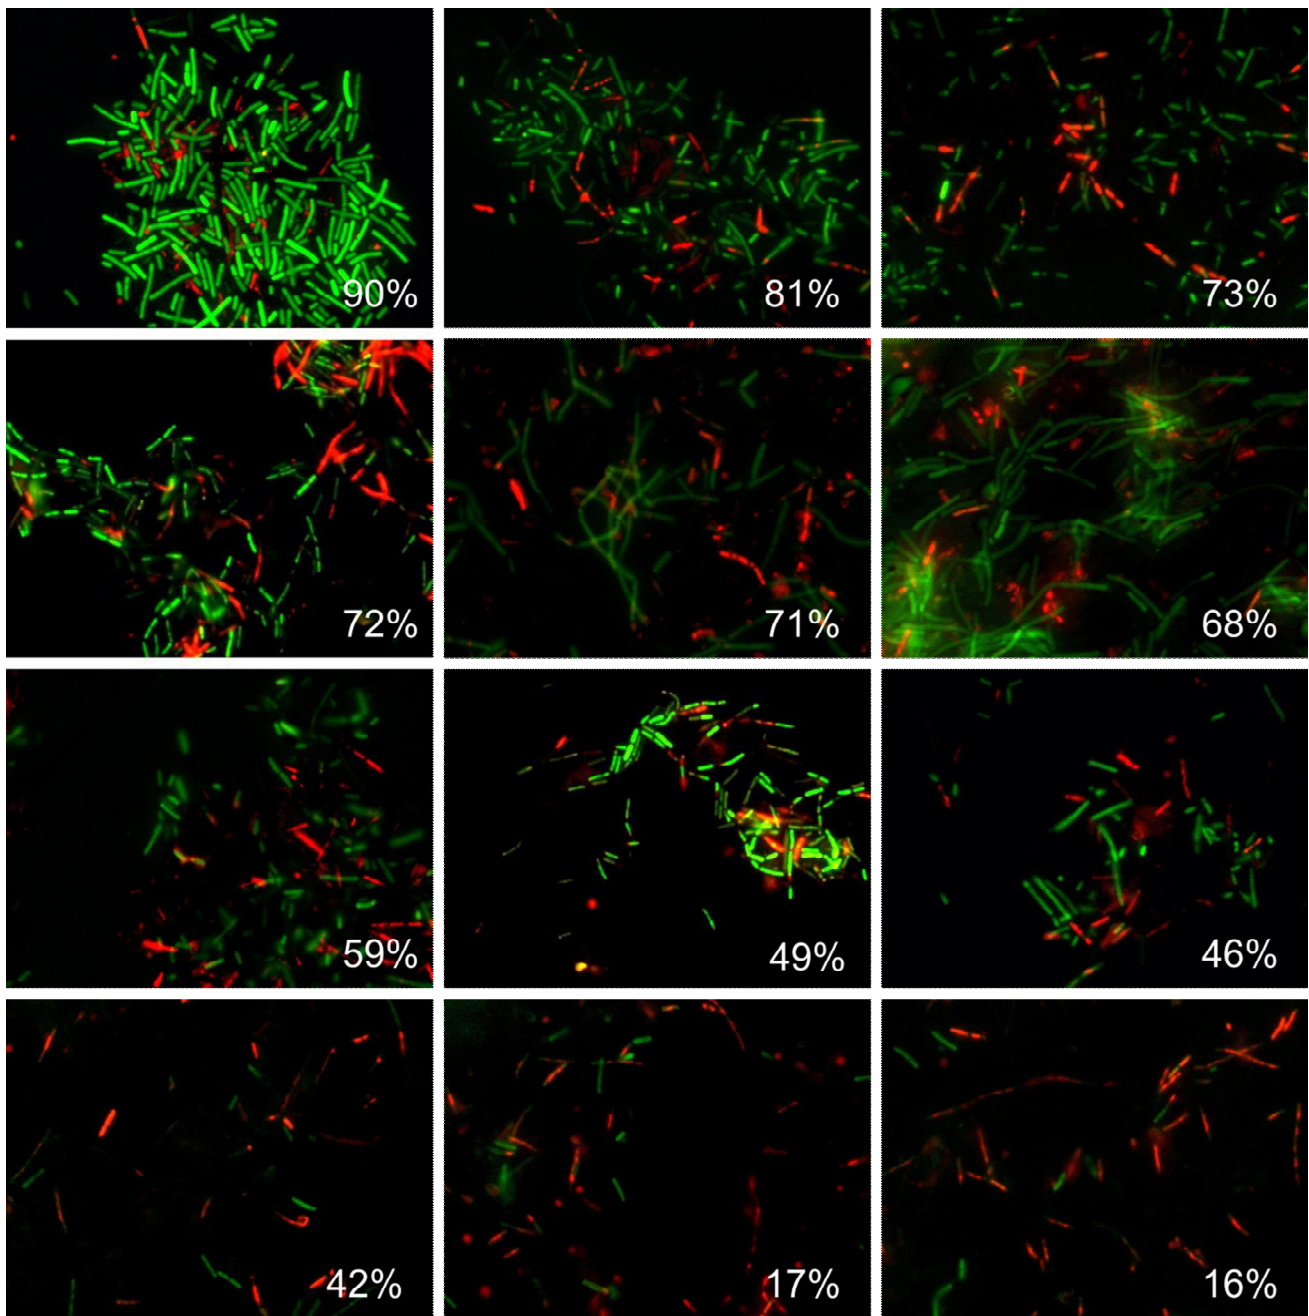

327

328 **Fig 4. Evaluation of the *B.subtilis* biofilm-embedded non-viable cells fraction by using**  
329 ***BioFilmAnalyzer* software exemplified for 12 microscopic images. The percentage of red-stained**  
330 **cells quantified by the *BioFilmAnalyzer* software is shown in each panel.**

331

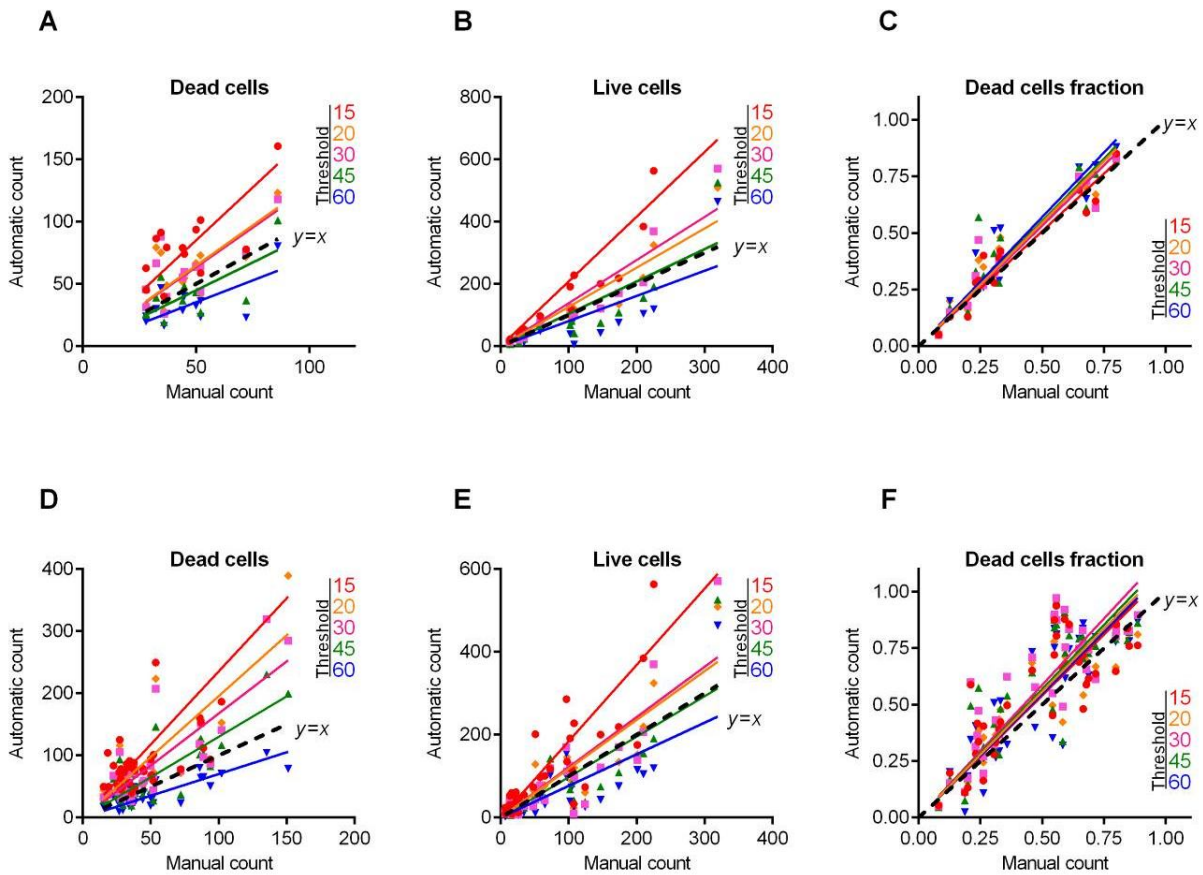

332

333

334 **Fig 5. *B. subtilis* cells count and live/dead ratio dependence on the image analysis threshold  $T$ .** Full  
335 lines show the linear regression lines, while dashed line shows the ideal counting line as determined by  
336 the manual analysis performed by several experts in visual microscopic image analysis. Panels A-C  
337 show data for the 12 images presented in Fig 4. Panels D-F show data for the 50 microscopic images  
338 taken randomly from different experiments with various imaging conditions.

339

340

341

342 **Table 2. Regression coefficients  $k$ , the coefficients of determination  $R^2$  and the accuracy**  
343 **coefficient  $L^2$  indicating the correspondence between the automatic and the manual counting for**  
344 **the *B.subtilis* live/dead ratios on fluorescent images**

| Threshold | 12 images |       |       | 50 images |       |       |
|-----------|-----------|-------|-------|-----------|-------|-------|
|           | k         | $R^2$ | $L^2$ | k         | $R^2$ | $L^2$ |
| 15        | 1,02      | 0,92  | 1,00  | 1,08      | 0,72  | 0,97  |
| 20        | 1,09      | 0,93  | 0,97  | 1,11      | 0,74  | 0,95  |
| 30        | 1,07      | 0,91  | 0,98  | 1,17      | 0,75  | 0,90  |
| 45        | 1,10      | 0,84  | 0,96  | 1,14      | 0,74  | 0,93  |
| 60        | 1,14      | 0,90  | 0,93  | 1,10      | 0,74  | 0,96  |

345

## 346 **Eukaryotic cells counting**

347 The performance of the *BioFilmAnalyzer* software was also analyzed for the eukaryotic cells.  
348 For that, Caco-2 cells were treated with different concentrations of camptothecin and analyzed after  
349 24h of exposition. Fig 6 and 7C show the fractions of viable cells quantified with *BioFilmAnalyzer*  
350 software on microphotographs with overlapped green and red channels. Here, the best fit of manual and  
351 automatic count of either live or dead cells was observed with the analysis threshold  $T=30$  (Fig 7),  
352 while higher background level led to artificial results at  $T=15$  (not shown). In contrast to bacterial cells,  
353 the accuracy was lower ( $L^2$  over 0.80), probably, because of discrepancies in cell sizes and non-evenly  
354 staining of cells. In contrast, when the software performance was evaluated on a series of 87 randomly  
355 chosen images (Fig 7 D-F), the automatic estimation of live/dead fractions fits with manual one with  
356 high confidence level ( $L^2$  equals 1.0, see Table 3). This effect could be attributed to the larger effective  
357 sizes and thus also smaller average number of cells in each field of view for eukaryotic cells compared  
358 to bacterial cells that in turn requires analyzing more images in order to obtain similar statistics.

359

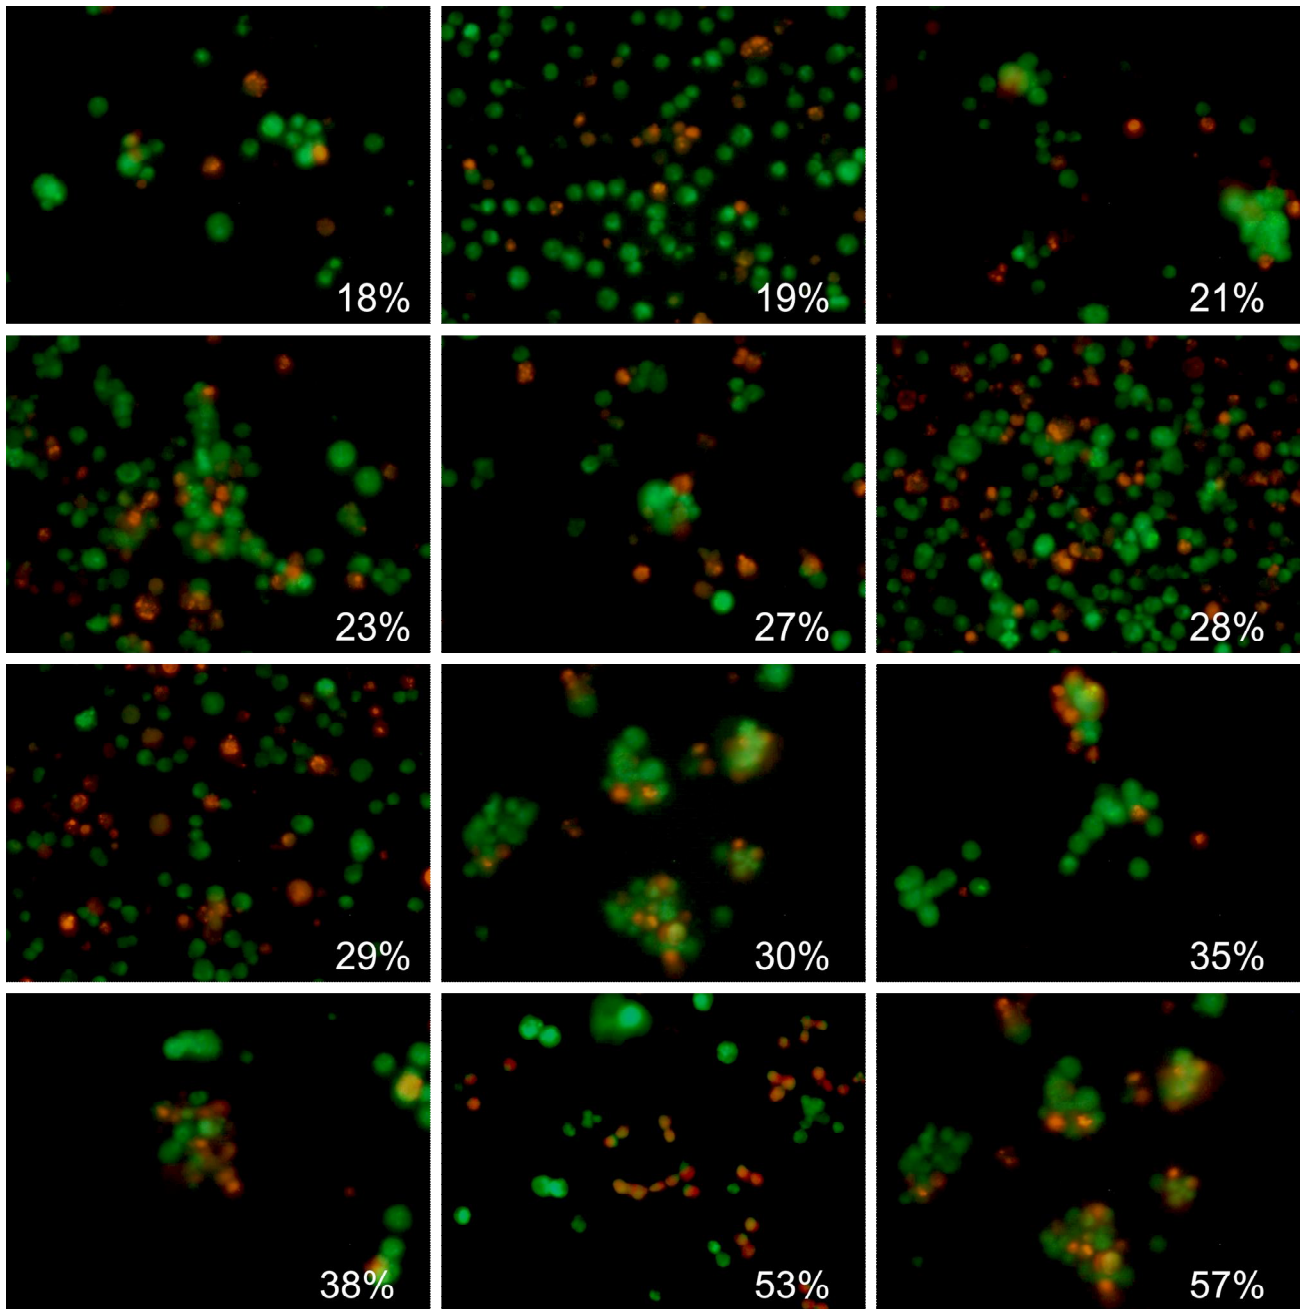

360

361 **Fig 6. Evaluation of the Caco-2 non-viable cells fraction by using *BioFilmAnalyzer* software**  
362 **exemplified for 12 microscopic images.** The percentage of red-stained cells quantified by the  
363 *BioFilmAnalyzer* software is shown in each panel

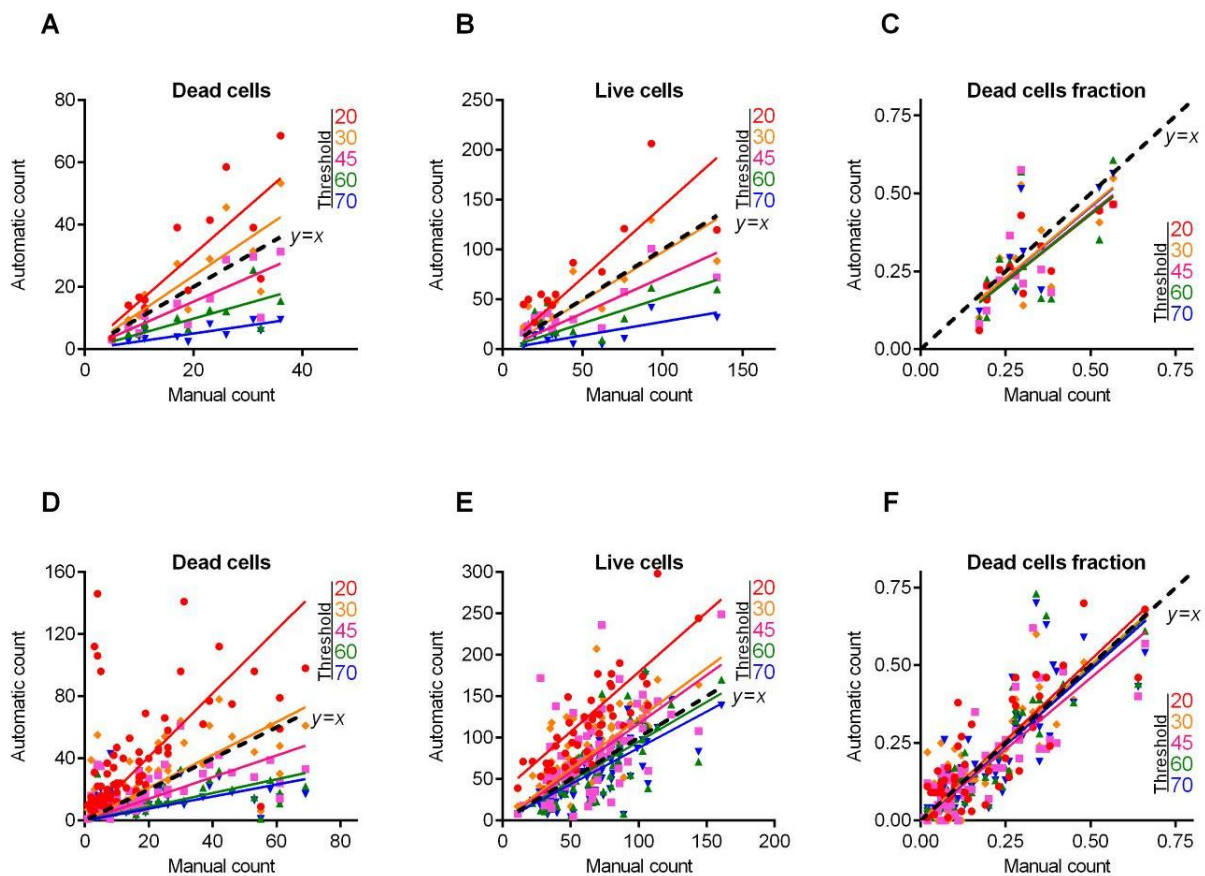

364

365

366 **Fig 7. Caco-2 cells count and live/dead ratio dependence on the image analysis threshold  $T$ .** Full  
367 lines show the linear regression lines, while dashed line shows the ideal counting line as determined by  
368 the manual analysis performed by several experts in visual microscopic image analysis. Panels A-C  
369 show data for the 12 images presented in Fig 6. Panels D-F show data for the 87 microscopic images  
370 taken randomly from different experiments with various imaging conditions

371

372

373 **Table 3. Regression coefficients  $k$ , the coefficients of determination  $R^2$  and the accuracy**  
374 **coefficient  $L^2$  indicating the correspondence between the automatic and the manual counting for**  
375 **the Caco-2 live/dead ratios on fluorescent images**

| Threshold | 12 images |       |       | 87 images |       |       |
|-----------|-----------|-------|-------|-----------|-------|-------|
|           | k         | $R^2$ | $L^2$ | k         | $R^2$ | $L^2$ |
| 15        | nd        | nd    | nd    | nd        | nd    | nd    |
| 20        | 0,86      | 0,69  | 0,80  | 1,03      | 0,73  | 1,00  |
| 30        | 0,92      | 0,53  | 0,93  | 1,00      | 0,76  | 1,00  |
| 45        | 0,88      | 0,46  | 0,83  | 0,92      | 0,71  | 0,97  |
| 60        | 0,87      | 0,40  | 0,81  | 0,99      | 0,73  | 1,00  |
| 70        | 0,91      | 0,54  | 0,92  | 0,97      | 0,71  | 1,00  |

376

377 To verify the accuracy of the overall procedure including the microscopy and automatic cells  
378 counting, the treated cells were detached from the wells by trypsin treatment, stained with DioC6 and  
379 ethidium bromide and aliquoted. One half of the sample was analyzed with flow cytometry to evaluate  
380 the fraction of necrotic cells, while the other half was subjected to microscopy and quantified by  
381 *BioFilmAnalyzer*. Fig 8 shows fractions of the non-viable cells in 4 independent repeats quantified with  
382 flow cytometry versus automatic analysis of series of 10 microphotographs from each sample with  
383 separate green and red channels (representative examples of images are shown in the figure).

384



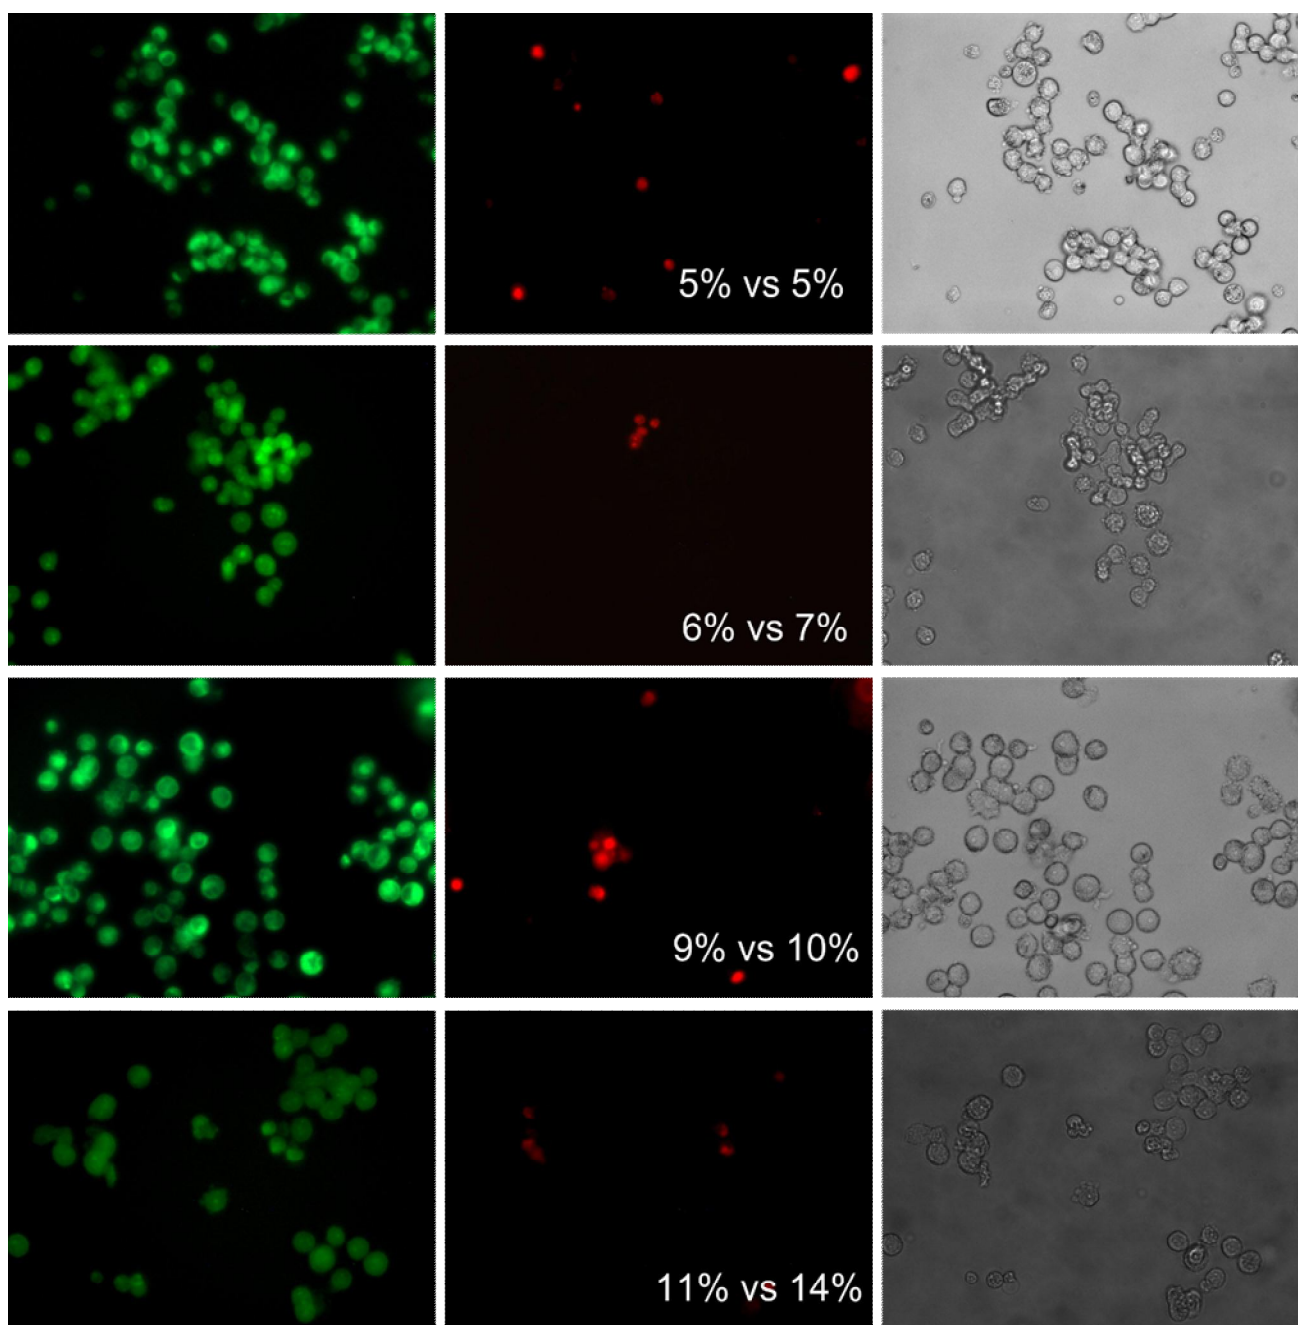

385

386 **Fig 8. The fraction of the non-viable eukaryotic cells quantified by flow cytometry versus**  
387 **automatic analysis with *BioFilmAnalyzer*.**

388

## 389 Quantification of confocal images with Z-stacks

390 Finally, we used the same algorithm and software to analyze the confocal images with Z-stacks,  
391 including 4 confocal images of *S.aureus* cells treated with different antimicrobials from our recent  
392 work [24]. For that, we analyzed the raw series of 2D images that were used previously to reconstruct  
393 3D images in [24], where the fraction of live/dead cells were evaluated by both automatic and manual  
394 expert counting (Fig 9).

395

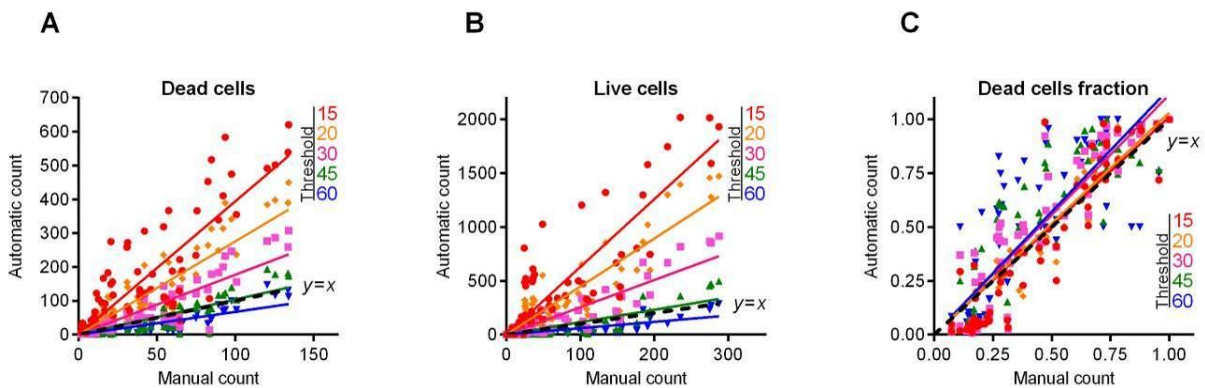

396

397 **Fig 9. Automatic vs manual cell count cell count and live/dead ratio dependence for different**  
398 **image analysis thresholds  $T$ .** Full lines show the linear regression lines, while dashed line shows the  
399 ideal counting line as determined by the manual analysis performed by several experts in visual  
400 microscopic image analysis. Four different confocal images containing between 12 and 23 Z-stacks  
401 each were taken for the analysis.

402

403 Typically 2d images obtained by confocal layer scanning technique are lower quality in  
404 comparison with single layer fluorescent microscopic images considered above. There are generally  
405 several contributing effects including defocus aberration of the cells that appear close but nevertheless  
406 displaced against the focal point due to the limited depth of focus as well as motion blur due to the

407 sample shift during operation. Both effects lead to blurred images, the problem that is partially resolved  
408 in the 3d reconstruction algorithms by averaging or smoothing filters that improve the overall image  
409 quality at the cost of its effective resolution. The question is, whether raw 2d images obtained by  
410 confocal layer scanning technique can be used for the cell sub-population quantification using our  
411 algorithm, and whether this would require some preliminary filtering to reduce blurring effects. For the  
412 latter, two standard image filtering techniques, namely the Gaussian and the Sobel filters have been  
413 tested. The Sobel filtering aims on edge detection in the images using a discrete differentiation operator  
414 which computes an approximation of the gradient of the image intensity function. Therefore this kind  
415 of image preparation might be helpful to make edges of cells more stepwise and thus to reduce the  
416 dependence of the performance of the cell counting algorithm on the choice of the threshold that may  
417 then appear anywhere within this step. Alternatively, blurring may be treated as effective additive noise  
418 that could be reduced with simple Gaussian filter. Exhibiting a Gaussian impulse response, such filter  
419 decreases the overall noise level in the image.

420 Figure 10 shows an example of the 2d confocal Z-stack microscopic image before and after  
421 Gaussian and Sobel filtering (upper panel) and the regression functions of automatic cells count at  
422 different thresholds as a function of the manual cell count (lower panel) before and after preliminary  
423 filtering of the images (obtained for the entire cohort of studied confocal images). The figure shows  
424 that, while the image appears visually less blurred, there is no significant improvement on cells fraction  
425 count according to the regression analysis results (see also Table 4). Furthermore, preliminary filtering  
426 leads to the overestimation of the red-stained cell count in some samples analyzed this way also  
427 corrupting the overall sub-population fraction estimates. Therefore, we find that due to the general  
428 robustness of the sub-population fraction estimation against the variations of the threshold  $T$  (and thus  
429 also its relation with the quantile of the image color distribution), 2d images obtained by confocal layer  
430 scanning technique can be analyzed without preliminary image filtering.

431

432 **Table 4. Regression coefficients  $k$ , the coefficients of determination  $R^2$  and the accuracy**  
433 **coefficient  $L^2$  indicating the correspondence between the automatic and the manual counting for**  
434 **the *S.aureus* live/dead ratios on confocal images.**

| Threshold | No filters |       |       | Gaussian |       |       | Sobel |       |       |
|-----------|------------|-------|-------|----------|-------|-------|-------|-------|-------|
|           | k          | $R^2$ | $L^2$ | k        | $R^2$ | $L^2$ | k     | $R^2$ | $L^2$ |
| 15        | 1,01       | 0,81  | 1,00  | 1,02     | 0,85  | 1,00  | 1,08  | 0,87  | 0,98  |
| 20        | 1,03       | 0,81  | 1,00  | 1,04     | 0,83  | 0,99  | 1,10  | 0,84  | 0,97  |
| 30        | 1,11       | 0,82  | 0,95  | 1,15     | 0,76  | 0,92  | 1,17  | 0,77  | 0,92  |
| 45        | 1,14       | 0,77  | 0,93  | 1,25     | 0,71  | 0,78  | 1,24  | 0,79  | 0,87  |
| 60        | 1,14       | 0,68  | 0,93  | 1,32     | 0,60  | 0,69  | 1,30  | 0,78  | 0,78  |

435

436

437

438

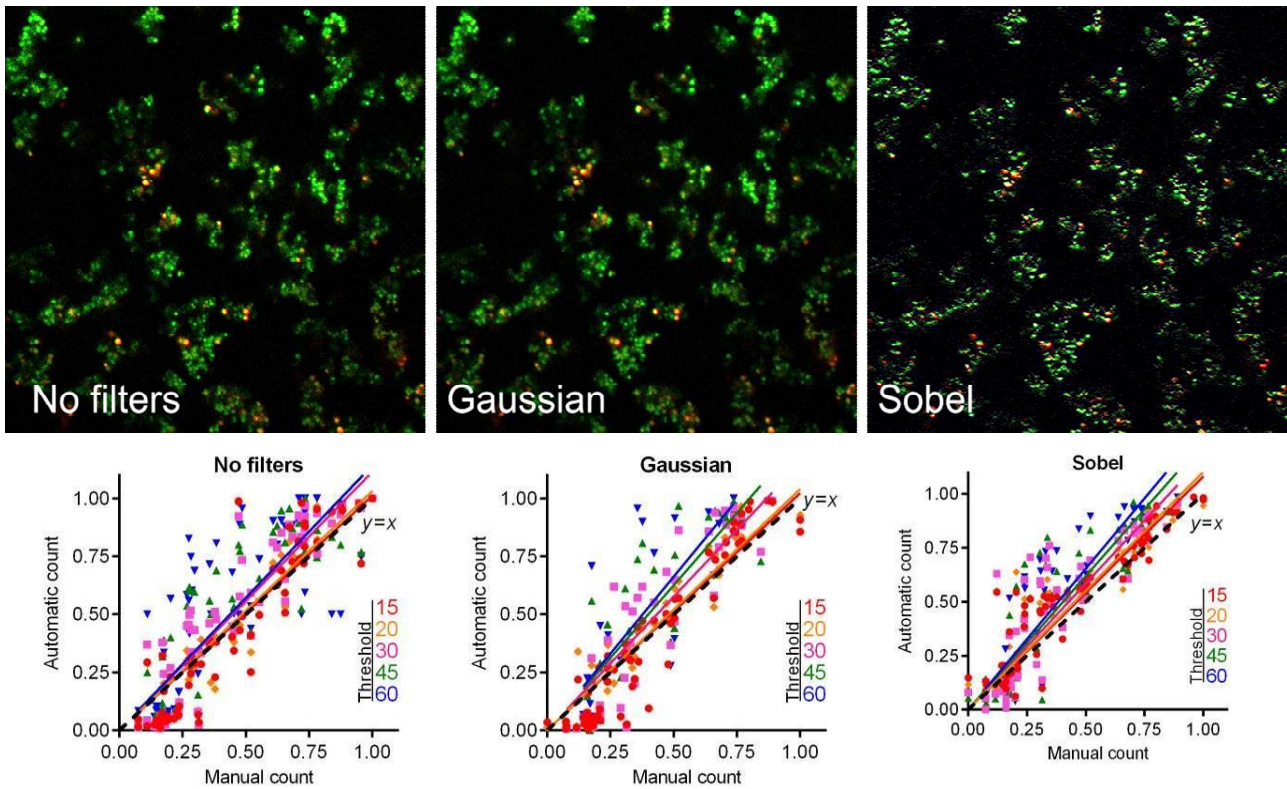

439

440

441 **Fig 10. The live/dead ratio dependencies for different image analysis thresholds  $T$ .** Full lines show  
442 the linear regression lines, while dashed line shows the ideal counting line as determined by the manual  
443 analysis performed by several experts in visual microscopic image analysis. Four confocal images  
444 containing between 12 and 23 Z-stacks were taken for the analysis, before and after being subjected to  
445 either Gaussian or Sobel filtering, as indicated.

446

447

## 448 **Conclusion**

449 To summarize, our results indicate that the sub-population fraction estimates obtained from  
450 fluorescent-stained cells imaging data by *BioFilmAnalyzer* are very close to the results obtained by  
451 other techniques such as expert manual counting and flow cytometry. The two-step algorithm  
452 implemented in the *BioFilmAnalyzer* that normalizes the stained image area in the units of the effective  
453 single cell size that are determined under partial manual control by the investigator performs largely  
454 independently of the cell shape and imaging conditions providing feasible results for cells aggregated  
455 in clusters. Moreover, in most cases no preliminary preparation or filtering of raw images is required.

456 Thus, we suggest that the proposed algorithm implemented as the *BioFilmAnalyzer* software  
457 can be used for numerous applications. First, preliminary evaluation of cell counts and live/dead ratios  
458 can be quickly obtained without expertise in image processing. Second, the analysis of surface-  
459 adherent bacterial or eukaryotic cells without their resuspension and maintenance of the native  
460 distribution pattern on the surface is possible. Third, the quantification of cellular sub-populations from  
461 2d confocal layer images is also possible. Fourth, the software allows quantification of the cells sub-  
462 populations expressing fluorescent proteins in during long-time incubation. Finally, because no further  
463 user intervention is required after few initial adjustment and cross-check procedures which usually take  
464 a couple of minutes using few representative images, further processing can be done over coffee-break  
465 by automated analysis of a series of images.

466 We believe that the suggested algorithm and software would be useful in saving time and efforts  
467 in cells sub-population quantification from fluorescent microscopy data that is commonly required in  
468 various biomedical, biotechnological and pharmacological studies, especially for the analysis of  
469 biofilm-embedded cells where the performance of conventional techniques based on cell counting or  
470 flow cytometry is strongly limited. Both the algorithm and the *BioFilmAnalyzer* can be freely

471 downloaded at <http://kpfu.ru/eng/strau/laboratories/molecular-genetics-of-microorganisms->  
472 [lab/software/biofilmanalyzer-v10](http://kpfu.ru/eng/strau/laboratories/molecular-genetics-of-microorganisms-lab/software/biofilmanalyzer-v10), utilized and redistributed.

473

474

## 475 **Acknowledgments**

476 The financial support of this work was provided by the Russian Science Foundation (project  
477 No. 15-14-00046, AK), by the Ministry of Education and Science of the Russian Federation (St.  
478 Petersburg Electrotechnical University, assignment 2.5475.2017/6.7, MB) and by the Program of  
479 competitive development of Kazan Federal University. The funders had no role in study design, data  
480 collection and analysis, decision to publish, or preparation of the manuscript.

481

482 **Data Availability:** All data are within the manuscript. The algorithm proposed in this  
483 manuscript is implemented as a simple software tool entitled *BioFilmAnalyzer* is freely available online  
484 at <http://kpfu.ru/eng/strau/laboratories/molecular-genetics-of-microorganisms->  
485 [lab/software/biofilmanalyzer-v10](http://kpfu.ru/eng/strau/laboratories/molecular-genetics-of-microorganisms-lab/software/biofilmanalyzer-v10)

486

487

## 488 **References**

- 489 1. Tawakoli PN, Al-Ahmad A, Hoth-Hannig W, Hannig M, Hannig C. Comparison of different  
490 live/dead stainings for detection and quantification of adherent microorganisms in the initial oral  
491 biofilm. *Clinical Oral Investigations*. 2013;17(3):841-50. doi: 10.1007/s00784-012-0792-3. PubMed  
492 PMID: WOS:000316749300019.
- 493 2. McMullan BJ, Desmarini D, Djordjevic JT, Chen SCA, Roper M, Sorrell TC. Rapid  
494 Microscopy and Use of Vital Dyes: Potential to Determine Viability of *Cryptococcus neoformans* in the  
495 Clinical Laboratory. *Plos One*. 2015;10(1). doi: 10.1371/journal.pone.0117186. PubMed PMID:  
496 WOS:000348821400028.
- 497 3. Atale N, Gupta S, Yadav UCS, Rani V. Cell-death assessment by fluorescent and nonfluorescent  
498 cytosolic and nuclear staining techniques. *Journal of Microscopy*. 2014;255(1):7-19. doi:  
499 10.1111/jmi.12133. PubMed PMID: WOS:000339710500002.
- 500 4. Netuschil L, Auschill TM, Sculean A, Arweiler NB. Confusion over live/dead stainings for the  
501 detection of vital microorganisms in oral biofilms - which stain is suitable? *Bmc Oral Health*. 2014;14.  
502 doi: 10.1186/1472-6831-14-2. PubMed PMID: WOS:000330071900001.
- 503 5. Gerstner AOH, Mittag A, Laffers W, Dahnert I, Lenz D, Bootz F, et al. Comparison of  
504 immunophenotyping by slide-based cytometry and by flow cytometry. *Journal of Immunological*  
505 *Methods*. 2006;311(1-2):130-8. doi: 10.1016/j.jim.2006.01.012. PubMed PMID:  
506 WOS:000237527200013.
- 507 6. Mital J, Schwarz J, Taatjes DJ, Ward GE. Laser scanning cytometer-based assays for measuring  
508 host cell attachment and invasion by the human pathogen *Toxoplasma gondii*. *Cytometry Part A*.  
509 2006;69A(1):13-9. doi: 10.1002/cyto.a.20202. PubMed PMID: WOS:000234383700002.
- 510 7. Adan A, Alizada G, Kiraz Y, Baran Y, Nalbant A. Flow cytometry: basic principles and  
511 applications. *Critical Reviews in Biotechnology*. 2017;37(2):163-76. doi:  
512 10.3109/07388551.2015.1128876. PubMed PMID: WOS:000392639500003.
- 513 8. van der Pol E, Hoekstra AG, Sturk A, Otto C, van Leeuwen TG, Nieuwland R. Optical and non-  
514 optical methods for detection and characterization of microparticles and exosomes. *Journal of*  
515 *Thrombosis and Haemostasis*. 2010;8(12):2596-607. doi: 10.1111/j.1538-7836.2010.04074.x. PubMed  
516 PMID: WOS:000285110700003.
- 517 9. Heydorn A, Nielsen AT, Hentzer M, Sternberg C, Givskov M, Ersboll BK, et al. Quantification  
518 of biofilm structures by the novel computer program COMSTAT. *Microbiology-Sgm*. 2000;146:2395-  
519 407. PubMed PMID: WOS:000089985400007.



- 520 10. Beyenal H, Donovan C, Lewandowski Z, Harkin G. Three-dimensional biofilm structure  
521 quantification. *Journal of Microbiological Methods*. 2004;59(3):395-413. doi:  
522 10.1016/j.mimet.2004.08.003. PubMed PMID: WOS:000224843300009.
- 523 11. Merritt JH, Kadouri DE, O'Toole GA. Growing and analyzing static biofilms. *Curr Protoc*  
524 *Microbiol*. 2005;Chapter 1:Unit 1B. doi: 10.1002/9780471729259.mc01b01s00. PubMed PMID:  
525 18770545; PubMed Central PMCID: PMCPMC4568995.
- 526 12. Ji L, Piper J, Tang JY. Erosion and dilation of binary images by arbitrary structuring elements  
527 using interval coding. *Pattern Recognition Letters*. 1989;9(3):201-9. doi: 10.1016/0167-  
528 8655(89)90055-x. PubMed PMID: WOS:A1989U514000008.
- 529 13. Adams R, Bischof L. SEEDED REGION GROWING. *Ieee Transactions on Pattern Analysis*  
530 *and Machine Intelligence*. 1994;16(6):641-7. doi: 10.1109/34.295913. PubMed PMID:  
531 WOS:A1994NR97200008.
- 532 14. Nattkemper TW, Twellmann T, Ritter H, Schubert W. Human vs. machine: evaluation of  
533 fluorescence micrographs. *Computers in Biology and Medicine*. 2003;33(1):31-43. doi: 10.1016/s0010-  
534 4825(02)00060-4. PubMed PMID: WOS:000180493700003.
- 535 15. Tchoukalova YD, Harteneck DA, Karwoski RA, Tarara J, Jensen MD. A quick, reliable, and  
536 automated method for fat cell sizing. *Journal of Lipid Research*. 2003;44(9):1795-801. doi:  
537 10.1194/jlr.D300001-JLR200. PubMed PMID: WOS:000185522300024.
- 538 16. Daims H, Lucker S, Wagner M. daime, a novel image analysis program for microbial ecology  
539 and biofilm research. *Environmental Microbiology*. 2006;8(2):200-13. doi: 10.1111/j.1462-  
540 2920.2005.00880.x. PubMed PMID: WOS:000234647600003.
- 541 17. Lempitsky V, Rother C, Roth S, Blake A. Fusion Moves for Markov Random Field  
542 Optimization. *Ieee Transactions on Pattern Analysis and Machine Intelligence*. 2010;32(8):1392-405.  
543 doi: 10.1109/tpami.2009.143. PubMed PMID: WOS:000278858600004.
- 544 18. Klinger-Strobel M, Suesse H, Fischer D, Pletz MW, Makarewicz O. A Novel Computerized Cell  
545 Count Algorithm for Biofilm Analysis. *Plos One*. 2016;11(5). doi: 10.1371/journal.pone.0154937.  
546 PubMed PMID: WOS:000375676800095.
- 547 19. Abramoff MD, Magalhães PJ, Ram SJ. Image processing with ImageJ2004; 11(7):[36-42 pp.].
- 548 20. Selinummi J, Seppala J, Yli-Harja O, Puhakka JA. Software for quantification of labeled  
549 bacteria from digital microscope images by automated image analysis. *Biotechniques*. 2005;39(6):859-  
550 63. doi: 10.2144/000112018. PubMed PMID: WOS:000234104900011.
- 551 21. Kayumov AR, Nureeva AA, Trizna EY, Gazizova GR, Bogachev MI, Shtyrlin NV, et al. New

- 552 Derivatives of Pyridoxine Exhibit High Antibacterial Activity against Biofilm-Embedded  
553 Staphylococcus Cells. *Biomed Research International*. 2015;10. doi: 10.1155/2015/890968. PubMed  
554 PMID: WOS:000367944100001.
- 555 22. Trizna E, Latypova L, Kurbangalieva A, Bogachev MI, Kayumov A. 2(5H)-Furanone  
556 Derivatives as Inhibitors of Staphylococcal Biofilms. *Bionanoscience*. 2016;6(4):423-6. doi:  
557 10.1007/s12668-016-0258-1. PubMed PMID: WOS:000390587700036.
- 558 23. Trizna EY, Khakimullina EN, Latypova LZ, Kurbangalieva AR, Sharafutdinov IS, Evtyugin  
559 VG, et al. Thio Derivatives of 2(5H)-Furanone As Inhibitors against *Bacillus subtilis* Biofilms. *Acta*  
560 *Naturae*. 2015;7(2):102-7. PubMed PMID: WOS:000355757100013.
- 561 24. Baidamshina DR, Trizna EY, Holyavka MG, Bogachev MI, Artyukhov VG, Akhatova FS, et al.  
562 Targeting microbial biofilms using Ficin, a nonspecific plant protease. *Scientific Reports*. 2017;7. doi:  
563 10.1038/srep46068. PubMed PMID: WOS:000398641900002.
- 564  
565  
566
